# Supplementary material
Source: ML conference proceedings conference paper supplement (https://openreview.net/forum?id=WxWO6KPg5g2)
Supplement: supplementary_material [file attachment]

## **Supplemental Material for “Deep Surrogate Assisted Generation of Environments”**

This is the supplemental material for the paper “Deep Surrogate Assisted Generation of Environments.” This material includes the following:

- `appendix.pdf`: Appendix for our paper.
- `code/`: Code and instructions to reproduce all experiments in the paper.
- `videos/`: Videos showing agent rollouts in environments generated in the paper. The videos are organized by figure number and letter.
